# Supplementary material
Source: PubMed Central journal article supplement (PMC8096668)
Supplement: NIHMS1681654-supplement-1.pdf [file NIHMS1681654-supplement-1.pdf]

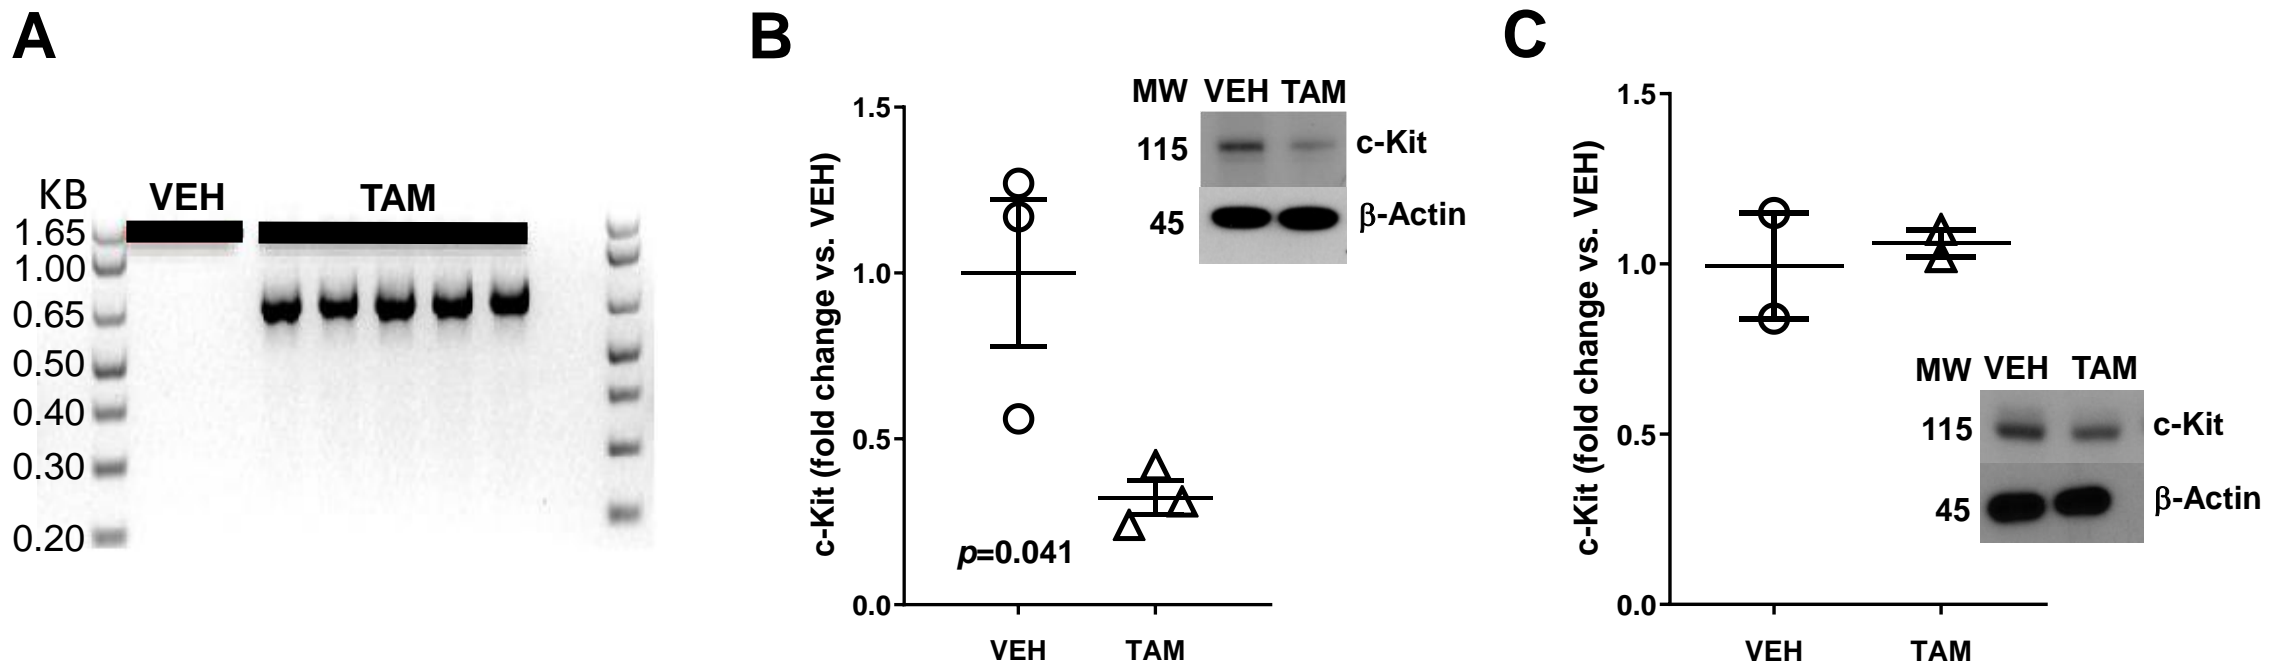

**Supplementary Figure 1. Characterization of the Kit<sup>SMC</sup> transgenic mouse.** (A) Aortic PCR of Kit<sup>SMC</sup> transgenic mice (Kit<sup>lox66-71/lox66-71</sup> Myh11-CreER<sup>T2</sup> ApoE<sup>-/-</sup>) injected intraperitoneally with either oil (VEH) or tamoxifen (TAM). PCR were performed using primers specific for the inverted (post-recombination) Kit<sup>lox66-71</sup> allele. Kit<sup>SMC</sup> mice treated with TAM showed the expected 0.65 kb band, while control mice injected with oil showed no bands. (B) Tamoxifen (TAM) rich diet for 4 weeks led to a significant reduction of c-Kit protein in the aorta of conditional mouse as determined by IP-WB. (C) Protein expression of c-Kit in the spleen showed no significant differences between TAM- or vehicle-treated animals. Data are presented as mean  $\pm$  S.E.M. c-Kit expression was normalized using  $\beta$ -actin levels, then standardized against expression in the vehicle. Groups were compared using a two-tailed t-test assuming unequal variance.

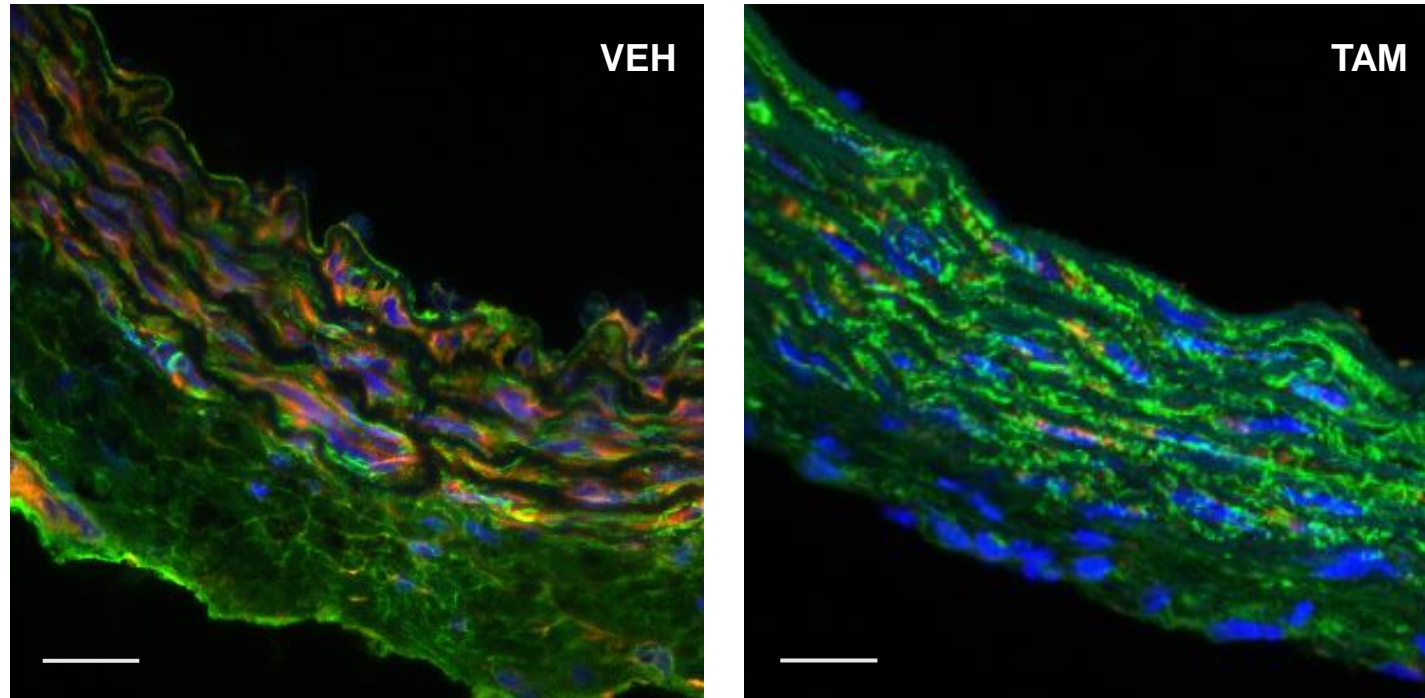

**Supplementary Figure 2. Significant reduction of c-Kit protein in the tunica media of conditional mice ( $\text{Kit}^{\text{SMC}}$ ) after tamoxifen-rich diet.** Confocal microscopy images of aortas from  $\text{Kit}^{\text{SMC}}$  mice ( $\text{Kit}^{\text{lox66-71/lox66-71}} \text{Myh11-CreER}^{\text{T2}} \text{ApoE}^{-/-}$ ) after feeding a tamoxifen chow (TAM) or normal chow (VEH) for 4 weeks. SMC were identified with an antibody against smooth muscle actin (SMA). Double positive cells for c-Kit (red) and SMA (green) in the media of vehicle treated mice appear yellow after merging color images. Nuclei were counterstained with DAPI (blue). Scale bars: 100  $\mu\text{m}$ .

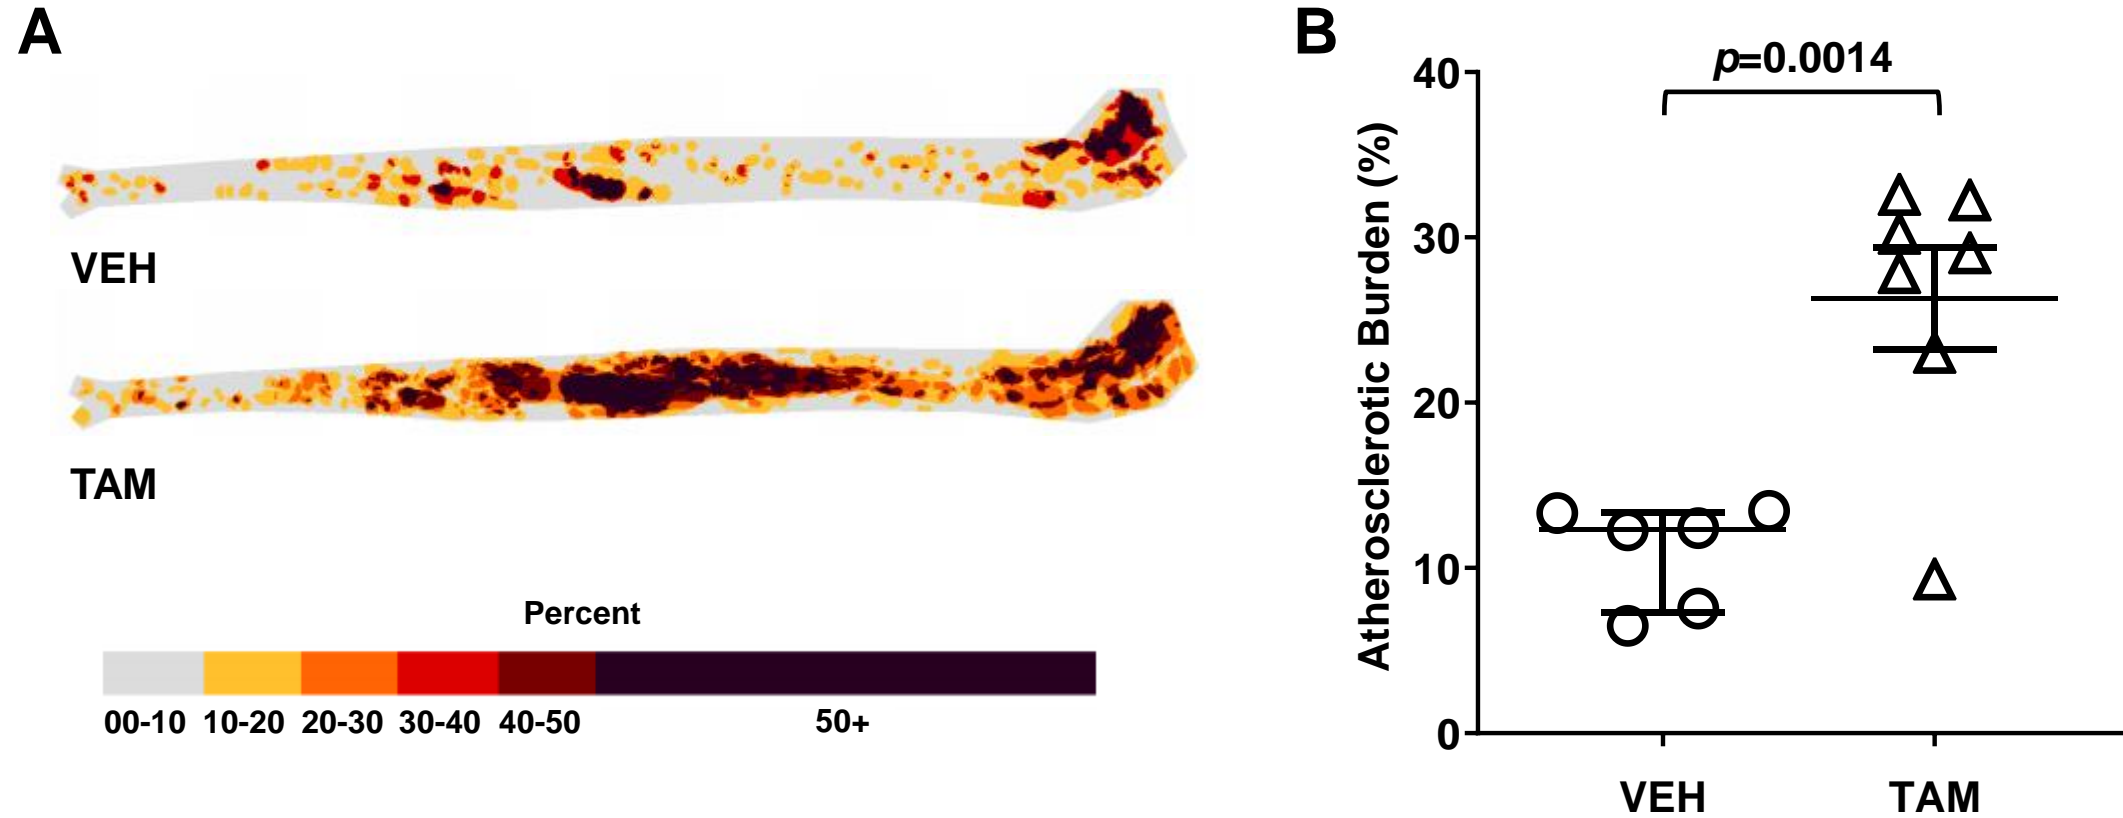

**Supplementary Figure 3. c-Kit inactivation in vascular SMC increases atherosclerosis in hyperlipidemic mice.** (A) Heat map of plaque occurrence in whole aortas from  $\text{Kit}^{\text{SMC}}$  ( $\text{Kit}^{\text{lox66-71/lox66-71}} \text{Myh11-CreER}^{\text{T2}} \text{ApoE}^{-/-}$ ) mice after feeding normal chow (VEH, n=6) or tamoxifen (TAM, n=7) rich diet for 4 weeks, followed by 16 weeks of high fat diet. (B) Quantification of percent atherosclerosis burden in the aorta. Error bars indicate the groups' median  $\pm$  interquartile range. Groups were compared using the Mann-Whitney test.

VEH

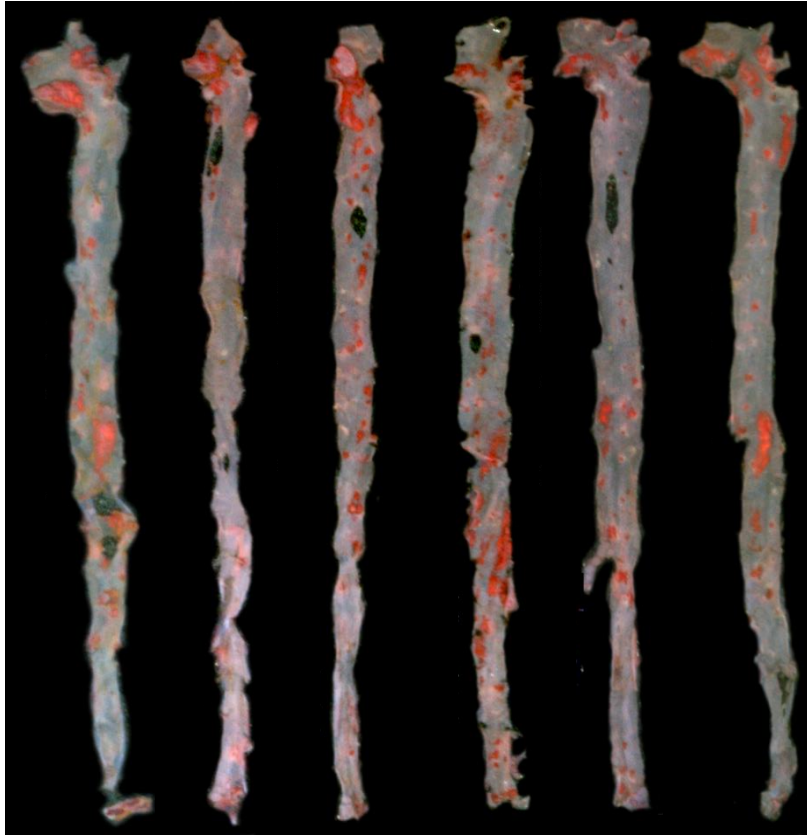

TAM

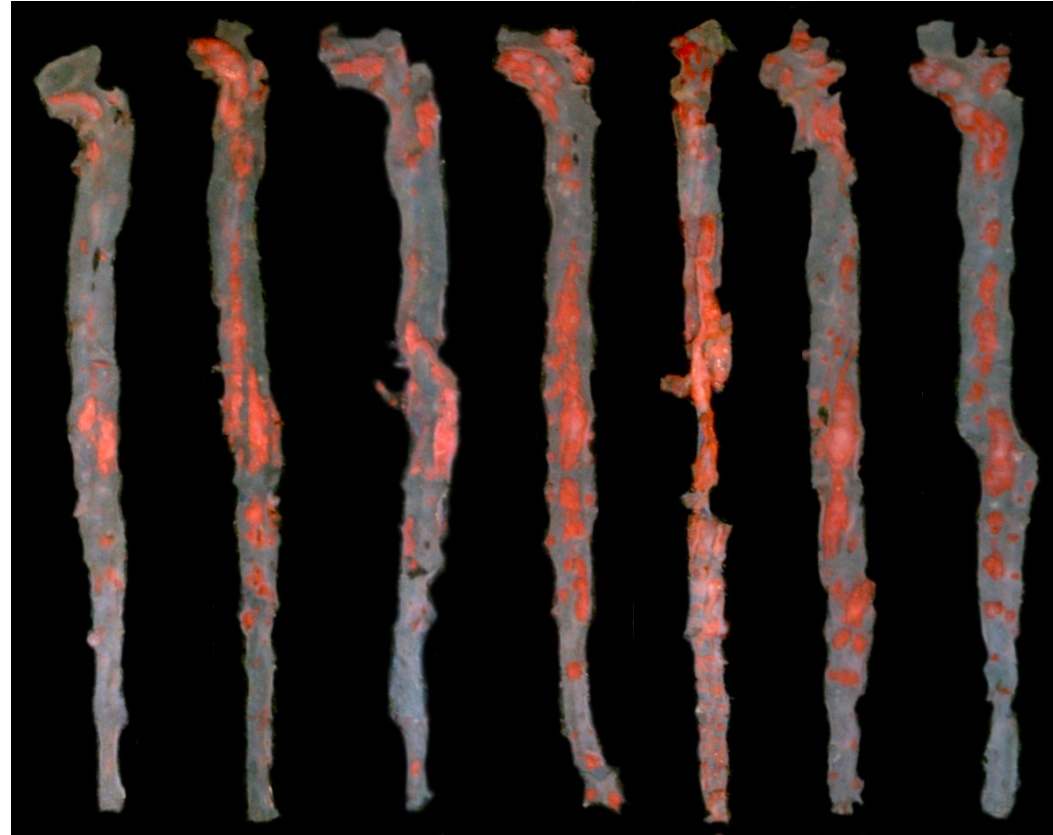

**Supplementary Figure 4. Complete images of Oil Red-O stained aortas from vehicle- and tamoxifen treated Kit<sup>SMC</sup> mice.** Complete images of Oil Red-O stained aortas from Kit<sup>SMC</sup> mice (Kit<sup>lox66-71/lox66-71</sup> Myh11-CreER<sup>T2</sup> ApoE<sup>-/-</sup>) fed tamoxifen (TAM)-rich chow (n=7) or normal chow (VEH, n=6) for 4 weeks, followed by high fat diet for 16 weeks.

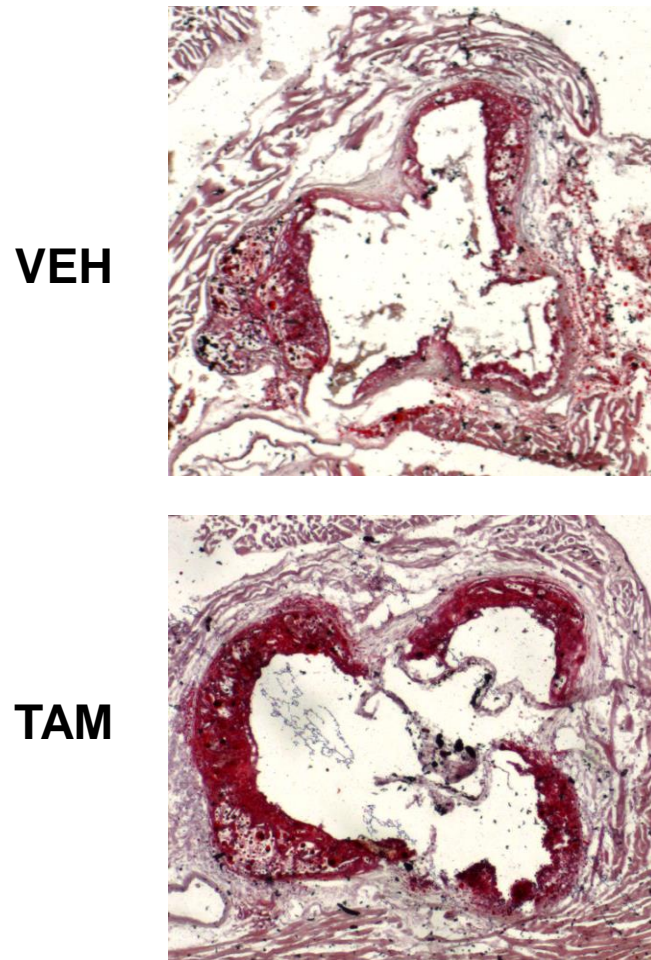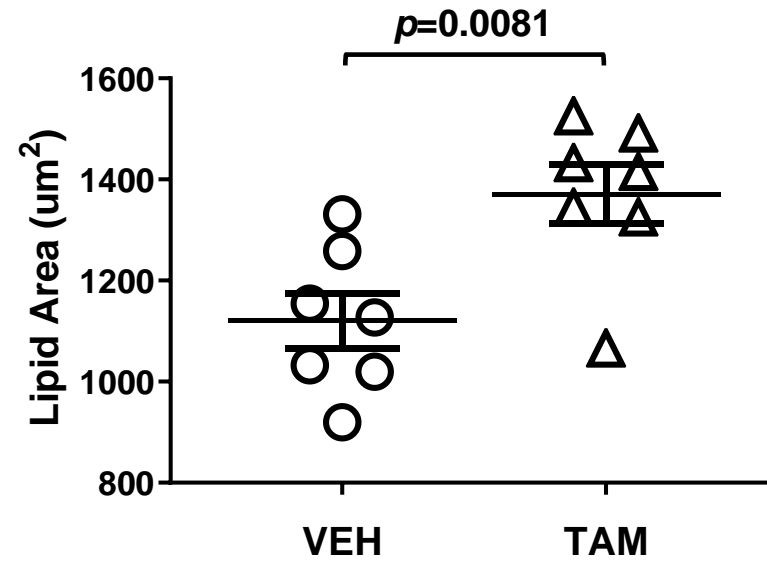

**Supplementary Figure 5. c-Kit inactivation in vascular SMC increases cholesterol content in lesions.** (A) Representative Oil Red-O staining of aortic valves from  $\text{Kit}^{\text{SMC}}$  ( $\text{Kit}^{\text{lox66-71/lox66-71}} \text{Myh11-CreERT}^2 \text{ApoE}^{-/-}$ ) mice after feeding normal chow (VEH) or tamoxifen (TAM) rich diet for 4 weeks, followed by 16 weeks of high fat diet (n=7 per group). (B) Quantification of lipid positive area in aortic valves. Data are presented as mean  $\pm$  S.E.M. and compared using a two-tailed Student's t-test.



**Kit<sup>WT</sup>**

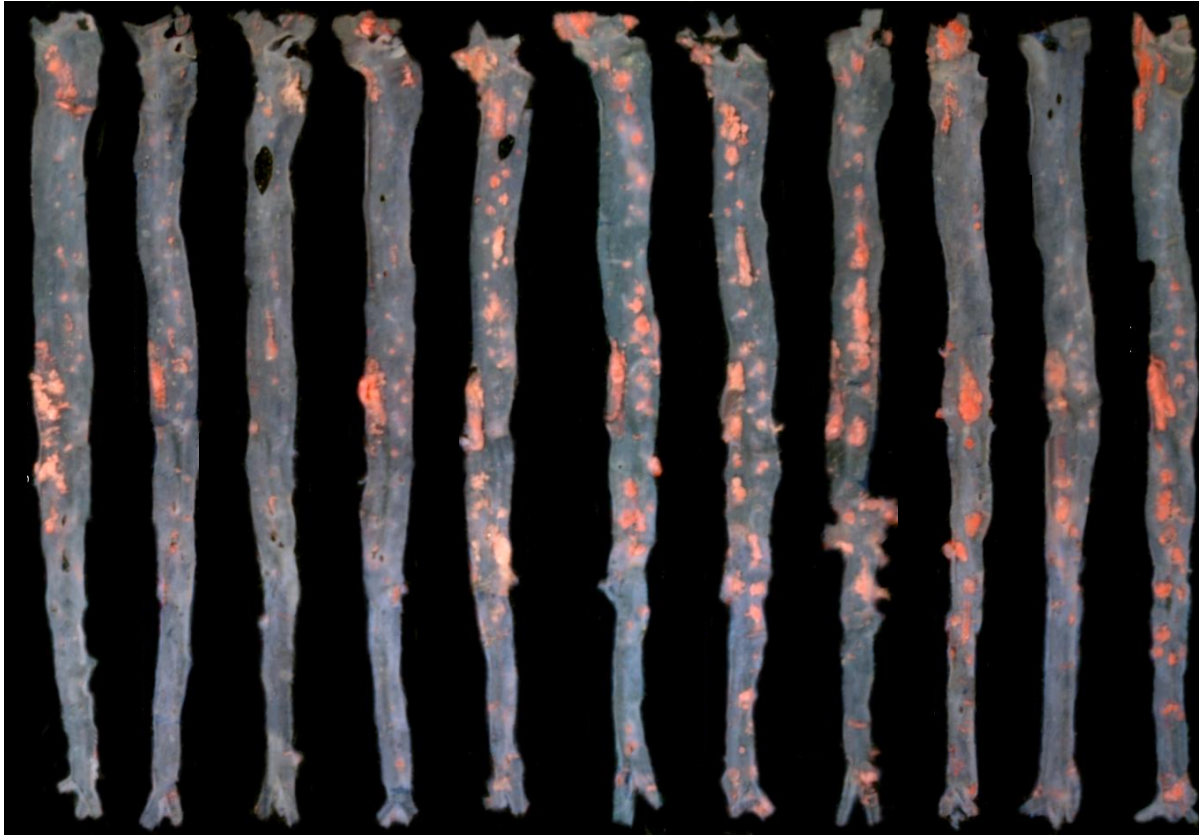

**Kit<sup>SMC</sup>**

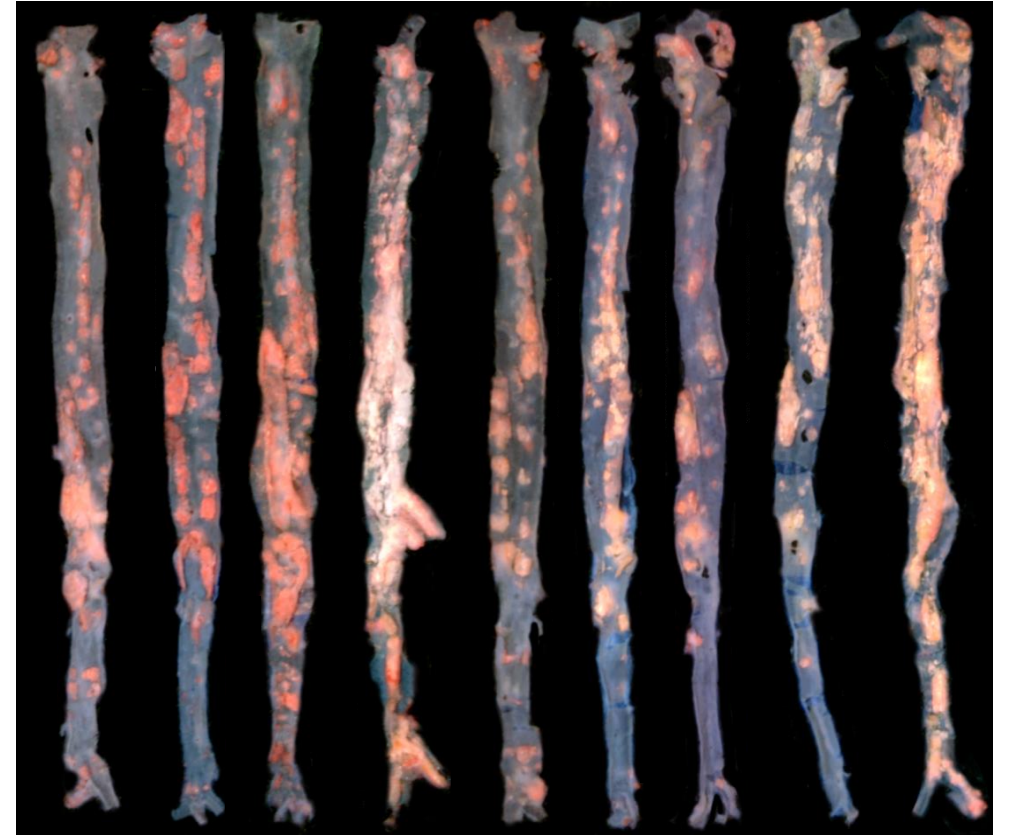

**Supplementary Figure 6. Complete images of Oil Red-O stained aortas from tamoxifen-treated Kit<sup>WT</sup> and Kit<sup>SMC</sup> mice.** Complete images of Oil Red-O stained aortas from Kit<sup>SMC</sup> (Kit<sup>lox66-71/lox66-71</sup> Myh11-CreER<sup>T2</sup> ApoE<sup>-/-</sup>, n=9) and Kit<sup>WT</sup> mice (Kit<sup>+/+</sup> Myh11 CreER<sup>T2</sup> ApoE<sup>-/-</sup>, n=11) fed tamoxifen-rich chow for 4 weeks, followed by high fat diet for 16 weeks.

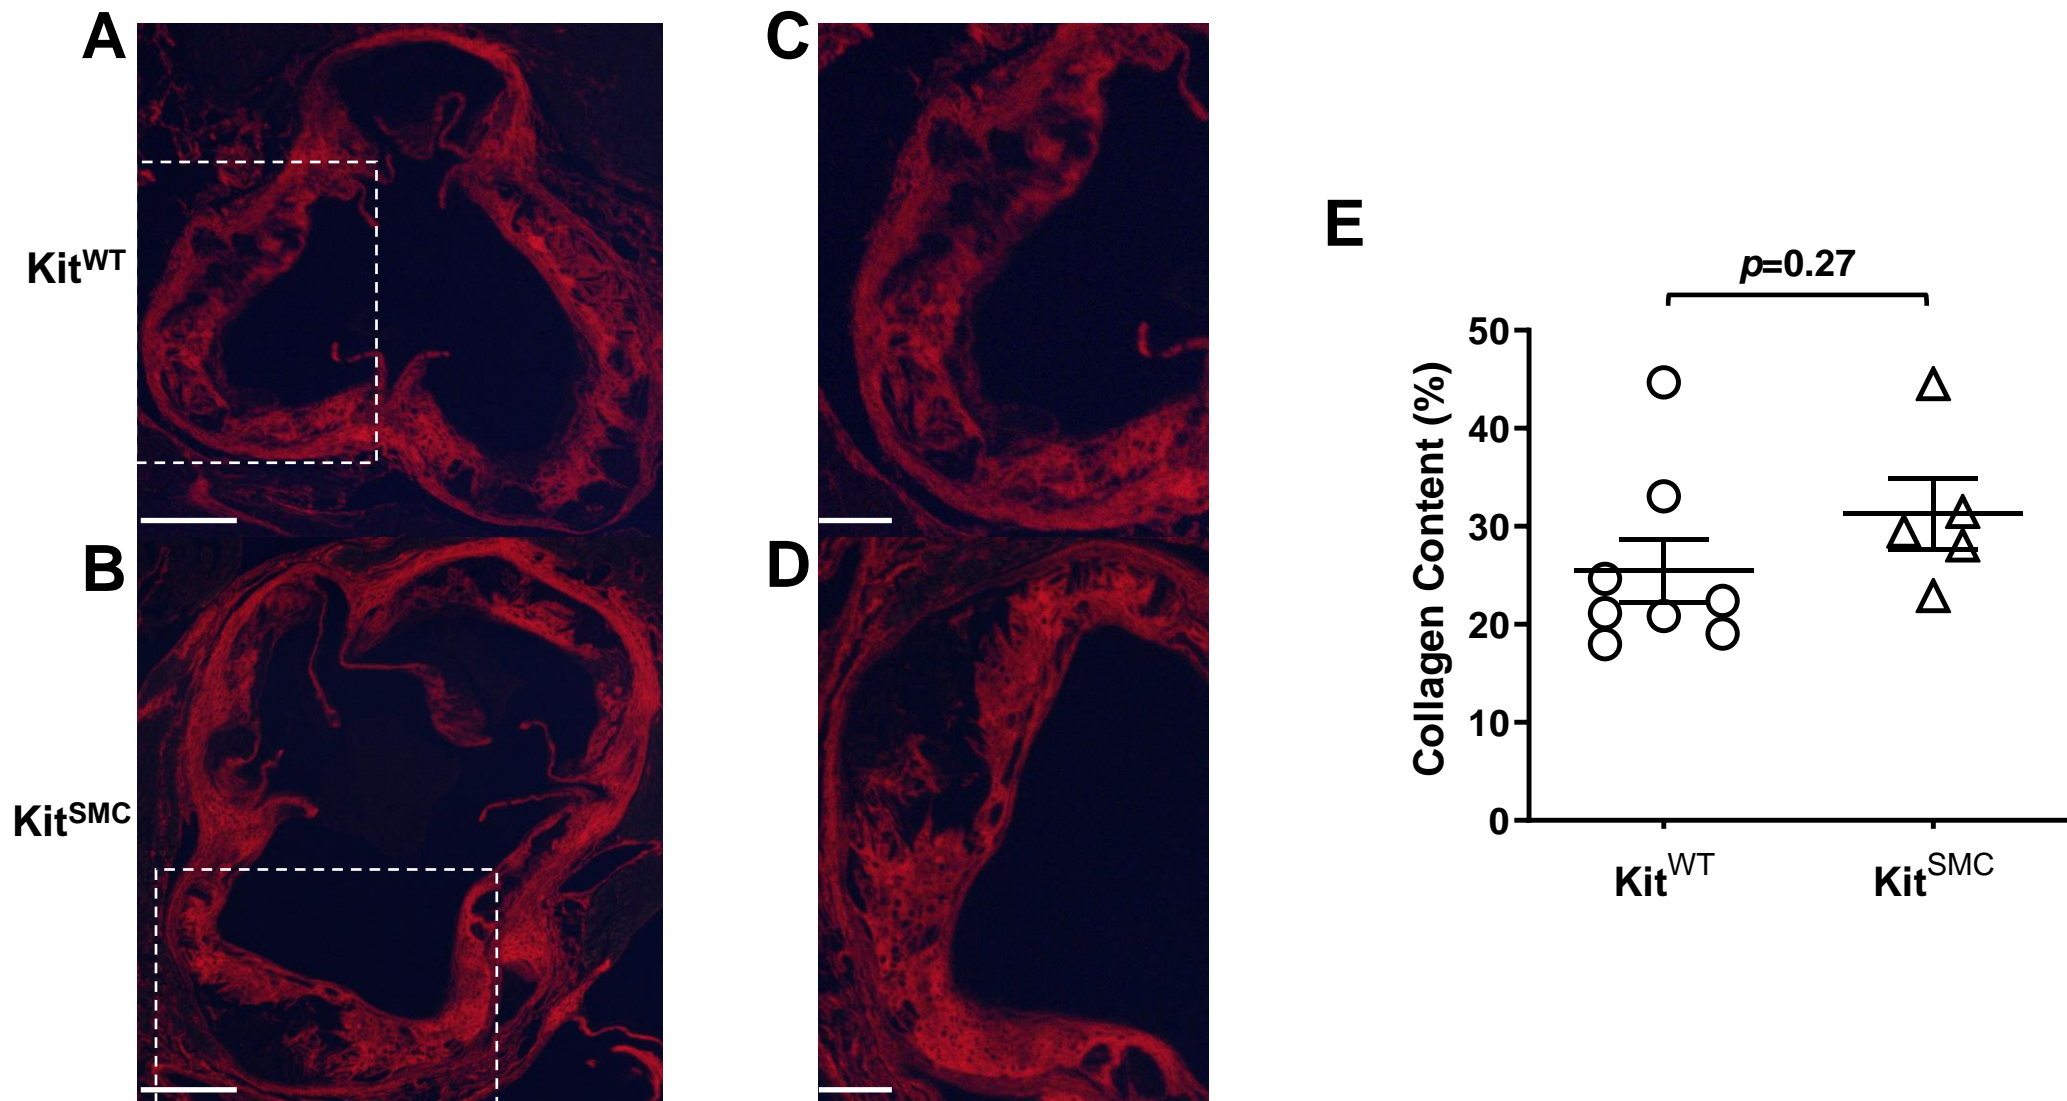

**Supplementary Figure 7. c-Kit inactivation in vascular SMC does not modify collagen content in lesions.** (A-B) Representative picosirius red staining of the aortic valve in *Kit<sup>WT</sup>* (*Kit<sup>+/+</sup> Myh11-CreER<sup>T2</sup> ApoE<sup>-/-</sup>*, n=8) and *Kit<sup>SMC</sup>* mice (*Kit<sup>66/71/66/71</sup> Myh11-CreER<sup>T2</sup> ApoE<sup>-/-</sup>*, n=5) after feeding tamoxifen-rich diet for 4 weeks, followed by 16 weeks of high fat diet. Scale bars=100  $\mu$ m. (C-D) Zoomed images of boxed areas in A and B, respectively. Scale bars=50  $\mu$ m. (E) Quantification of collagen content as percent of total lesion area. Data are presented as mean  $\pm$  S.E.M. and compared using a two-tailed Student's t-test.

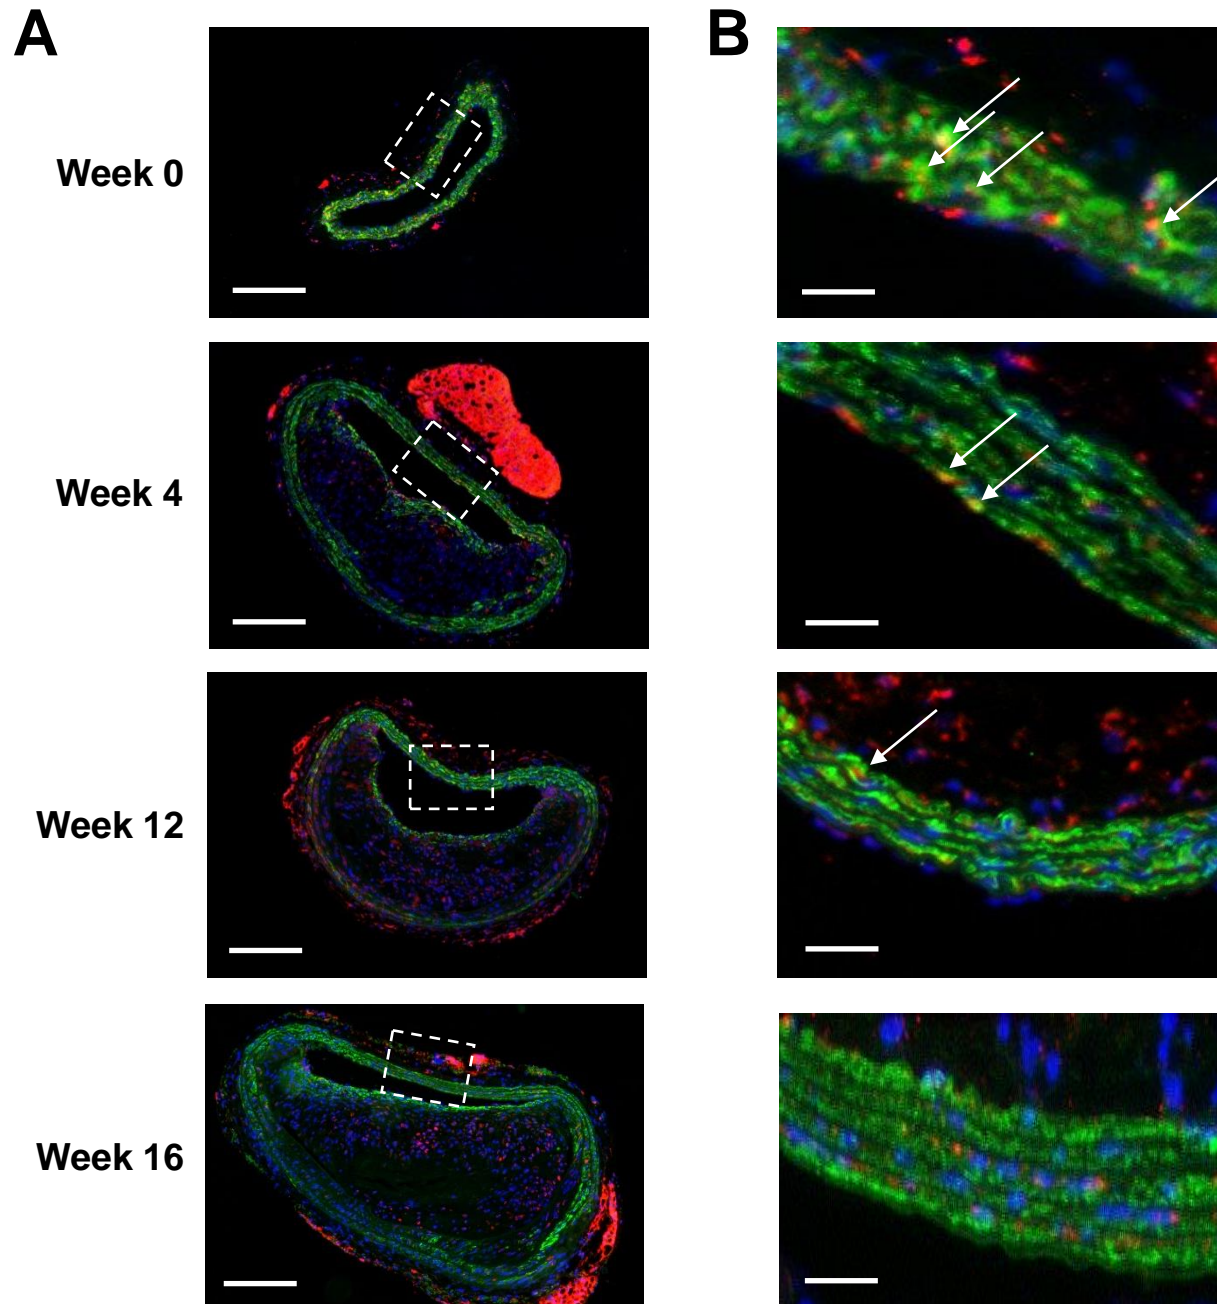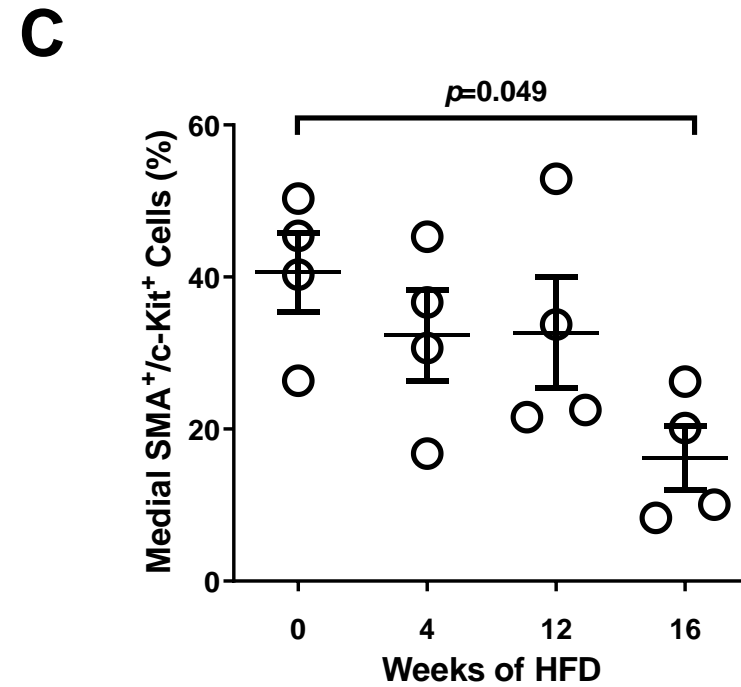

**Supplementary Figure 8. c-Kit expression over time in hyperlipidemic mice** (A) Representative merged immunofluorescent images of carotid arteries from Kit<sup>WT</sup> (*Kit*<sup>+/+</sup> *Myh11-CreER*<sup>T2</sup> *ApoE*<sup>-/-</sup>) mice after high fat diet for 0, 4, 12, and 16 weeks (n=4 per time point). Scale bars=100  $\mu$ m. (B) Zoomed images of the media in the boxed areas in A. Sections were stained for c-Kit (red) and SMA (green). Nuclei were counterstained with DAPI (blue). Scale bars=20  $\mu$ m. (C) Quantification of double positive SMA<sup>+</sup>/c-Kit<sup>+</sup> cells in the carotid media as percentage of total DAPI<sup>+</sup> cells. Data are presented as mean  $\pm$  S.E.M. Groups were compared using a one-way ANOVA followed by Tukey's multiple comparisons test.



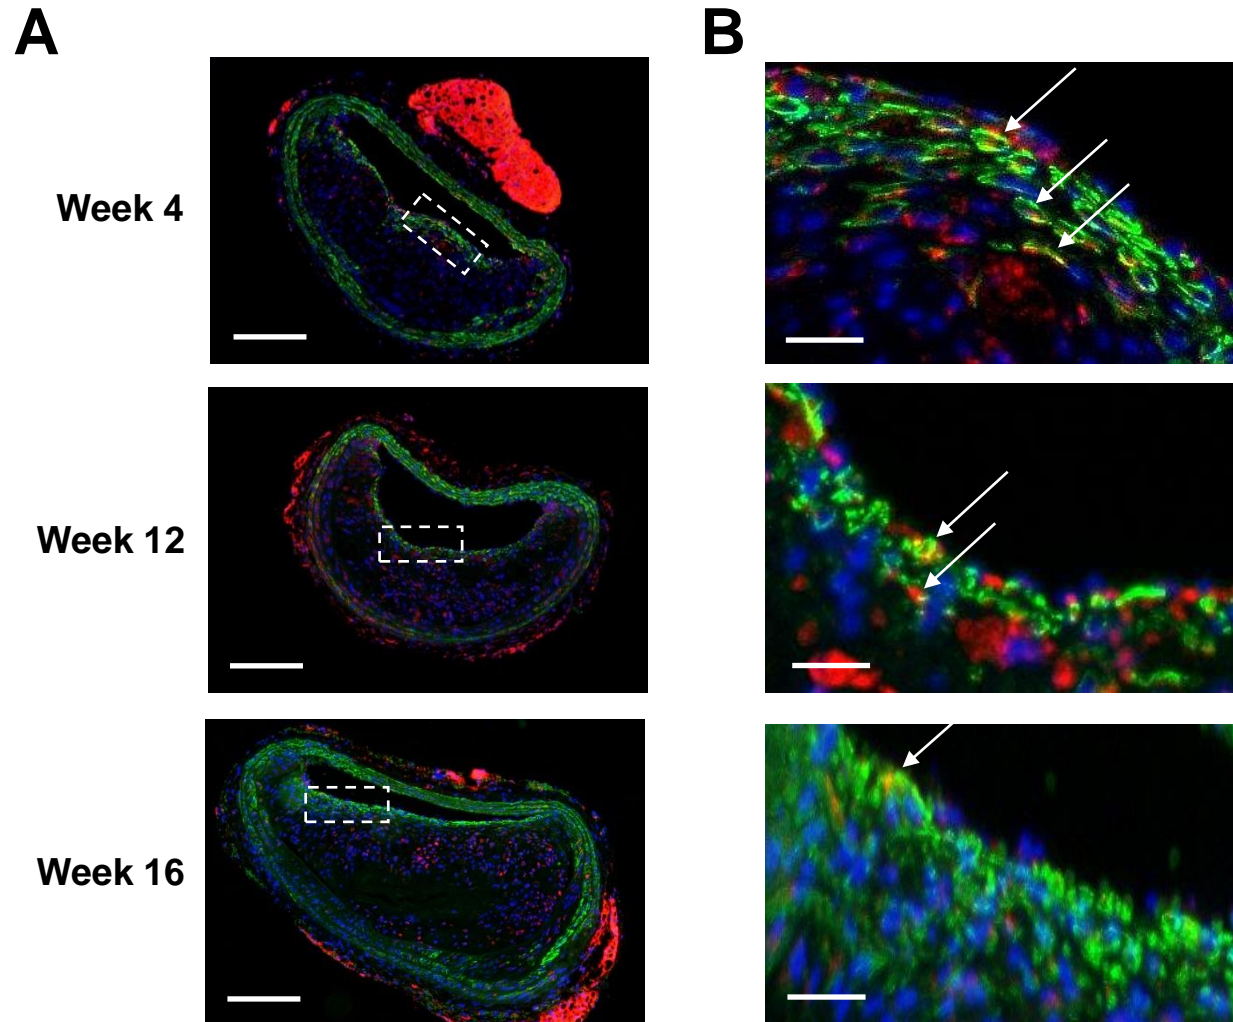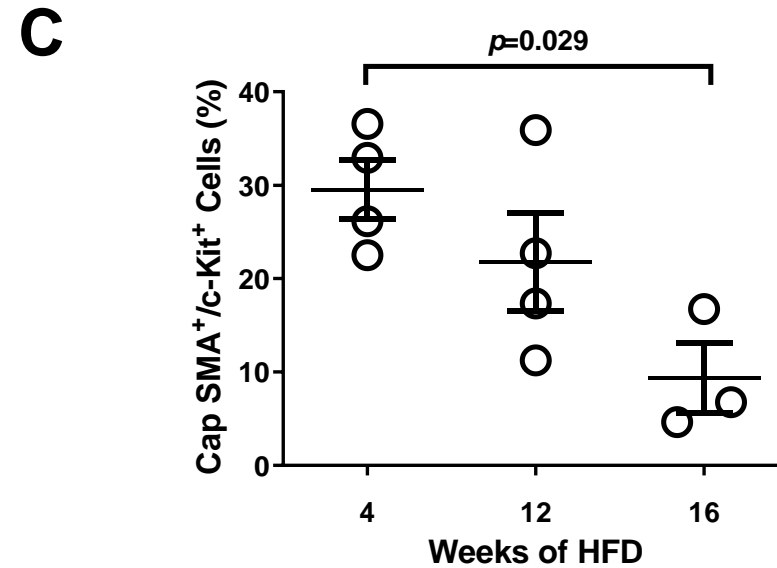

**Supplementary Figure 9. c-Kit expression over time in hyperlipidemic mice** (A) Representative merged immunofluorescent images of carotid arteries from Kit<sup>WT</sup> (*Kit*<sup>+/+</sup> *Myh11-CreER*<sup>T2</sup> *ApoE*<sup>-/-</sup>) mice after high fat diet for 4, 12, and 16 weeks (n=4 per time point). Scale bars=100  $\mu$ m. (B) Zoomed images of the lesion caps in the boxed areas in A. Sections were stained for c-Kit (red) and SMA (green). Nuclei were counterstained with DAPI (blue). Scale bars=20  $\mu$ m. (C) Quantification of double positive SMA<sup>+</sup>/c-Kit<sup>+</sup> cells in the carotid plaque cap as percentage of total DAPI<sup>+</sup> cells. Data are presented as mean  $\pm$  S.E.M. Groups were compared using a one-way ANOVA followed by Tukey's multiple comparisons test.

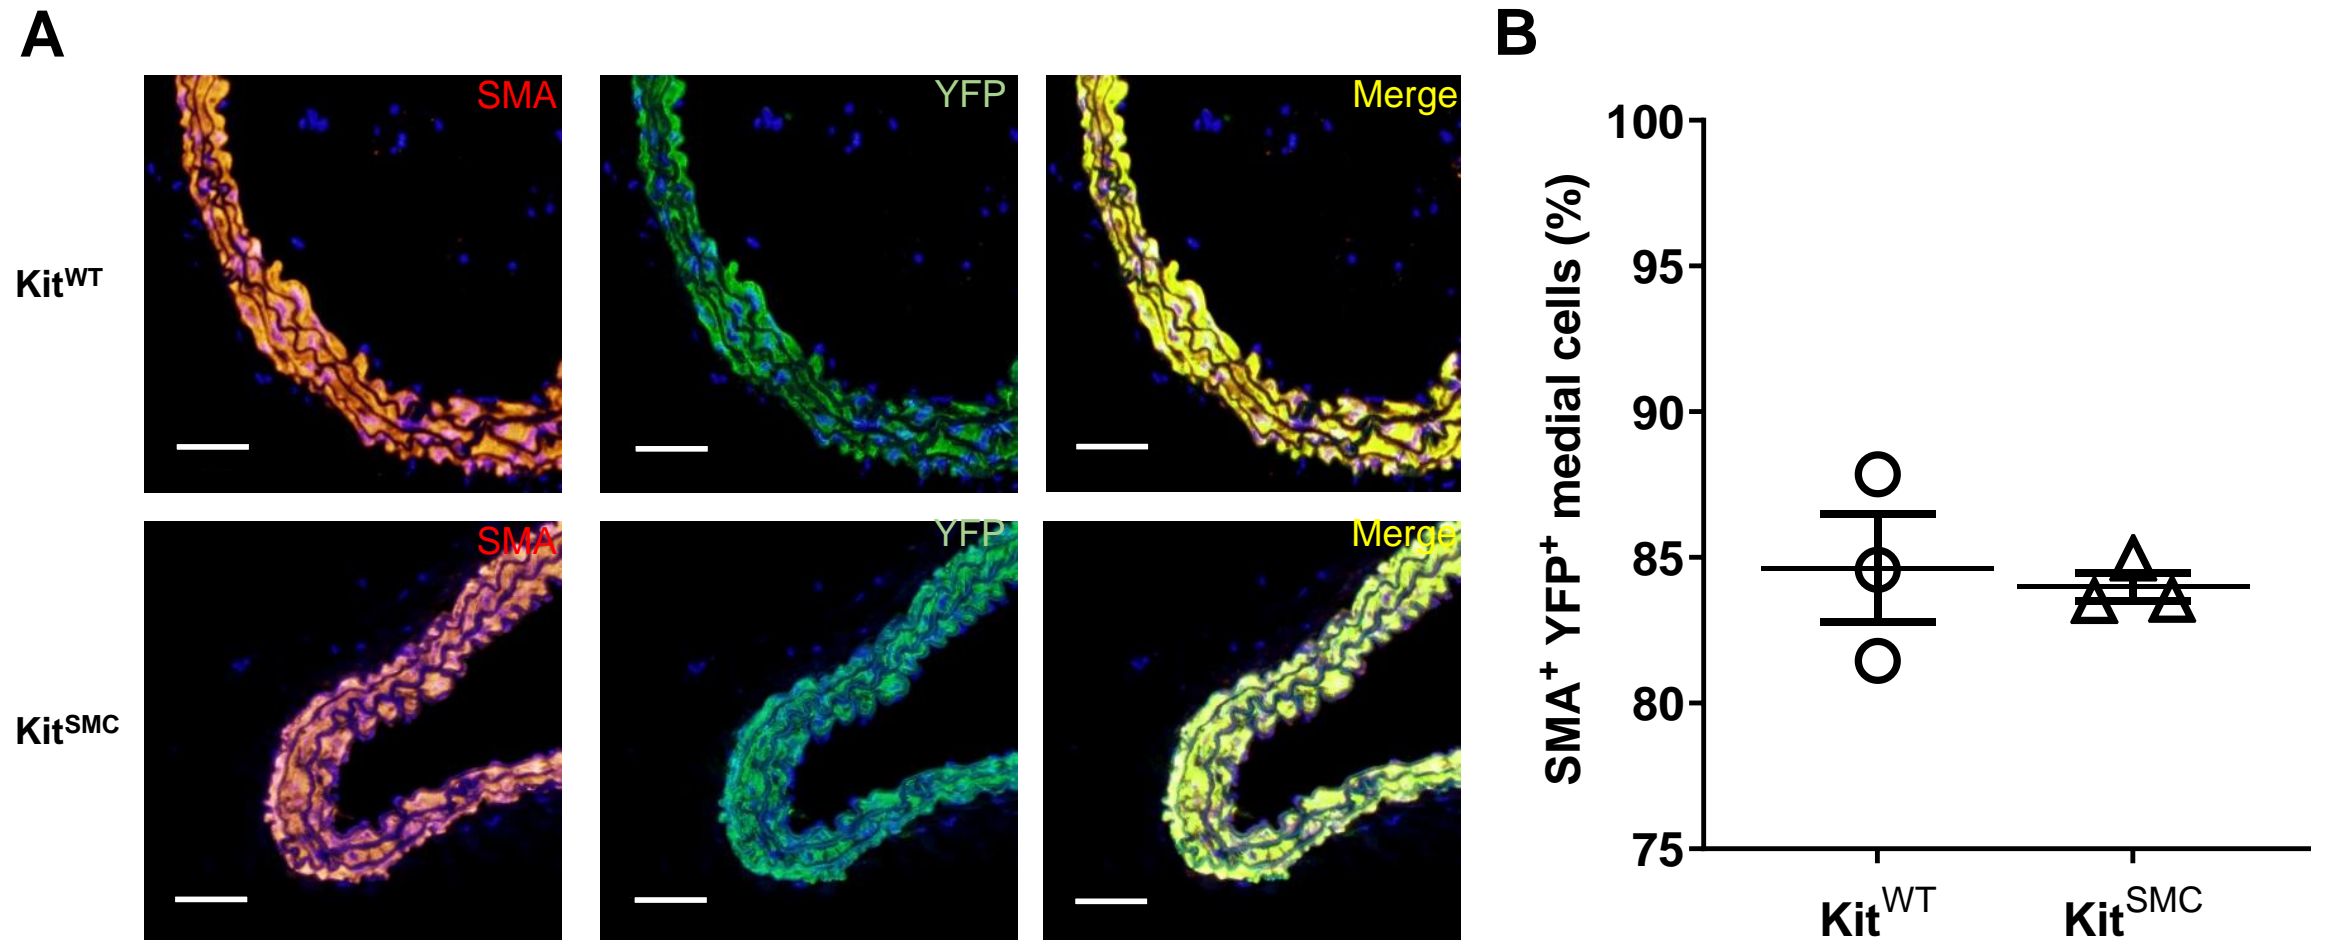

**Supplementary Figure 10. No significant differences in SMA<sup>+</sup> YFP<sup>+</sup> expression in Kit<sup>SMC</sup> eYFP and Kit<sup>WT</sup> eYFP transgenic mice.** (A) Representative immunofluorescent images of carotid arteries from Kit<sup>WT</sup> (Kit<sup>+/+</sup> Myh11-CreER<sup>T2</sup> eYFP ApoE<sup>-/-</sup>, n=3) and Kit<sup>SMC</sup> (Kit<sup>lox66-71/lox66-71</sup> Myh11-CreER<sup>T2</sup> eYFP ApoE<sup>-/-</sup>, n=3) mice after feeding tamoxifen-rich diet for 4 week. Sections were stained for SMA (red) and YFP (green). Nuclei were counterstained with DAPI (blue). (B) Quantification of medial SMA<sup>+</sup> YFP<sup>+</sup> double positive cells as percentage of DAPI<sup>+</sup> cells in both experimental groups. Data are presented as mean ± S.E.M. and compared using a two-tailed Student's t-test.

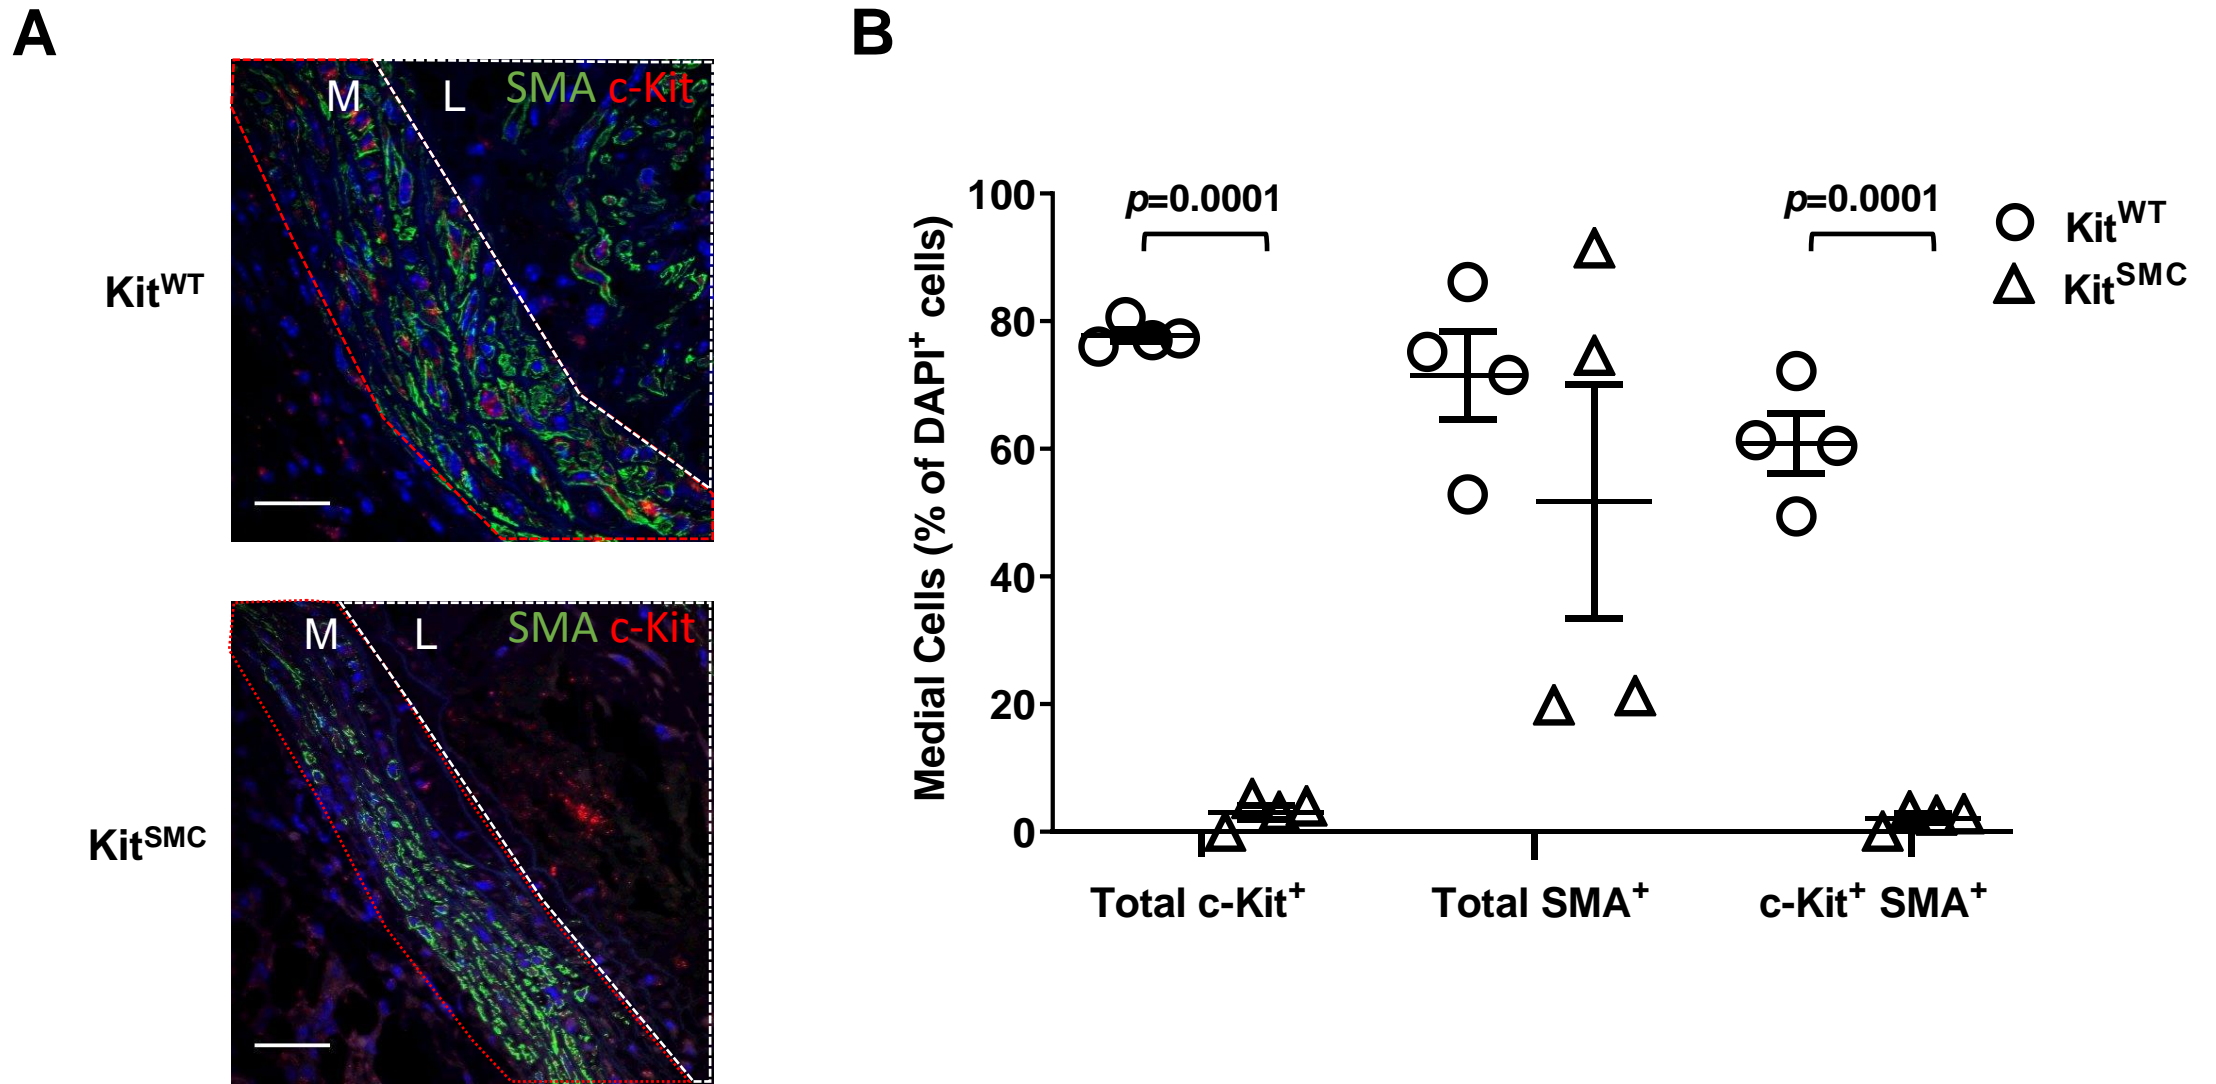

**Supplementary Figure 11. c-Kit expression in the media of tamoxifen-treated Kit<sup>SMC</sup> eYFP and Kit<sup>WT</sup> eYFP mice.** (A) Representative merged immunofluorescent images of the aortic sinus media from Kit<sup>WT</sup> (Kit<sup>+/+</sup> Myh11-CreER<sup>T2</sup> eYFP ApoE<sup>-/-</sup>, n=4) and Kit<sup>SMC</sup> (Kit<sup>lox66-71/lox66-71</sup> Myh11-CreER<sup>T2</sup> eYFP ApoE<sup>-/-</sup>, n=4) mice after tamoxifen-rich diet for 4 weeks, followed by high fat diet for 16 weeks. Sections were stained for c-Kit (red) and SMA (green). Nuclei were counterstained with DAPI (blue). The media (M) is outlined in red, while the lesion (L) is outlined in white. (B) Quantification of cell populations in the aortic sinus media as percentage of total DAPI<sup>+</sup> cells in both experimental groups. Data are presented as mean ± S.E.M. Groups were compared using a two-tailed Student's t-test.

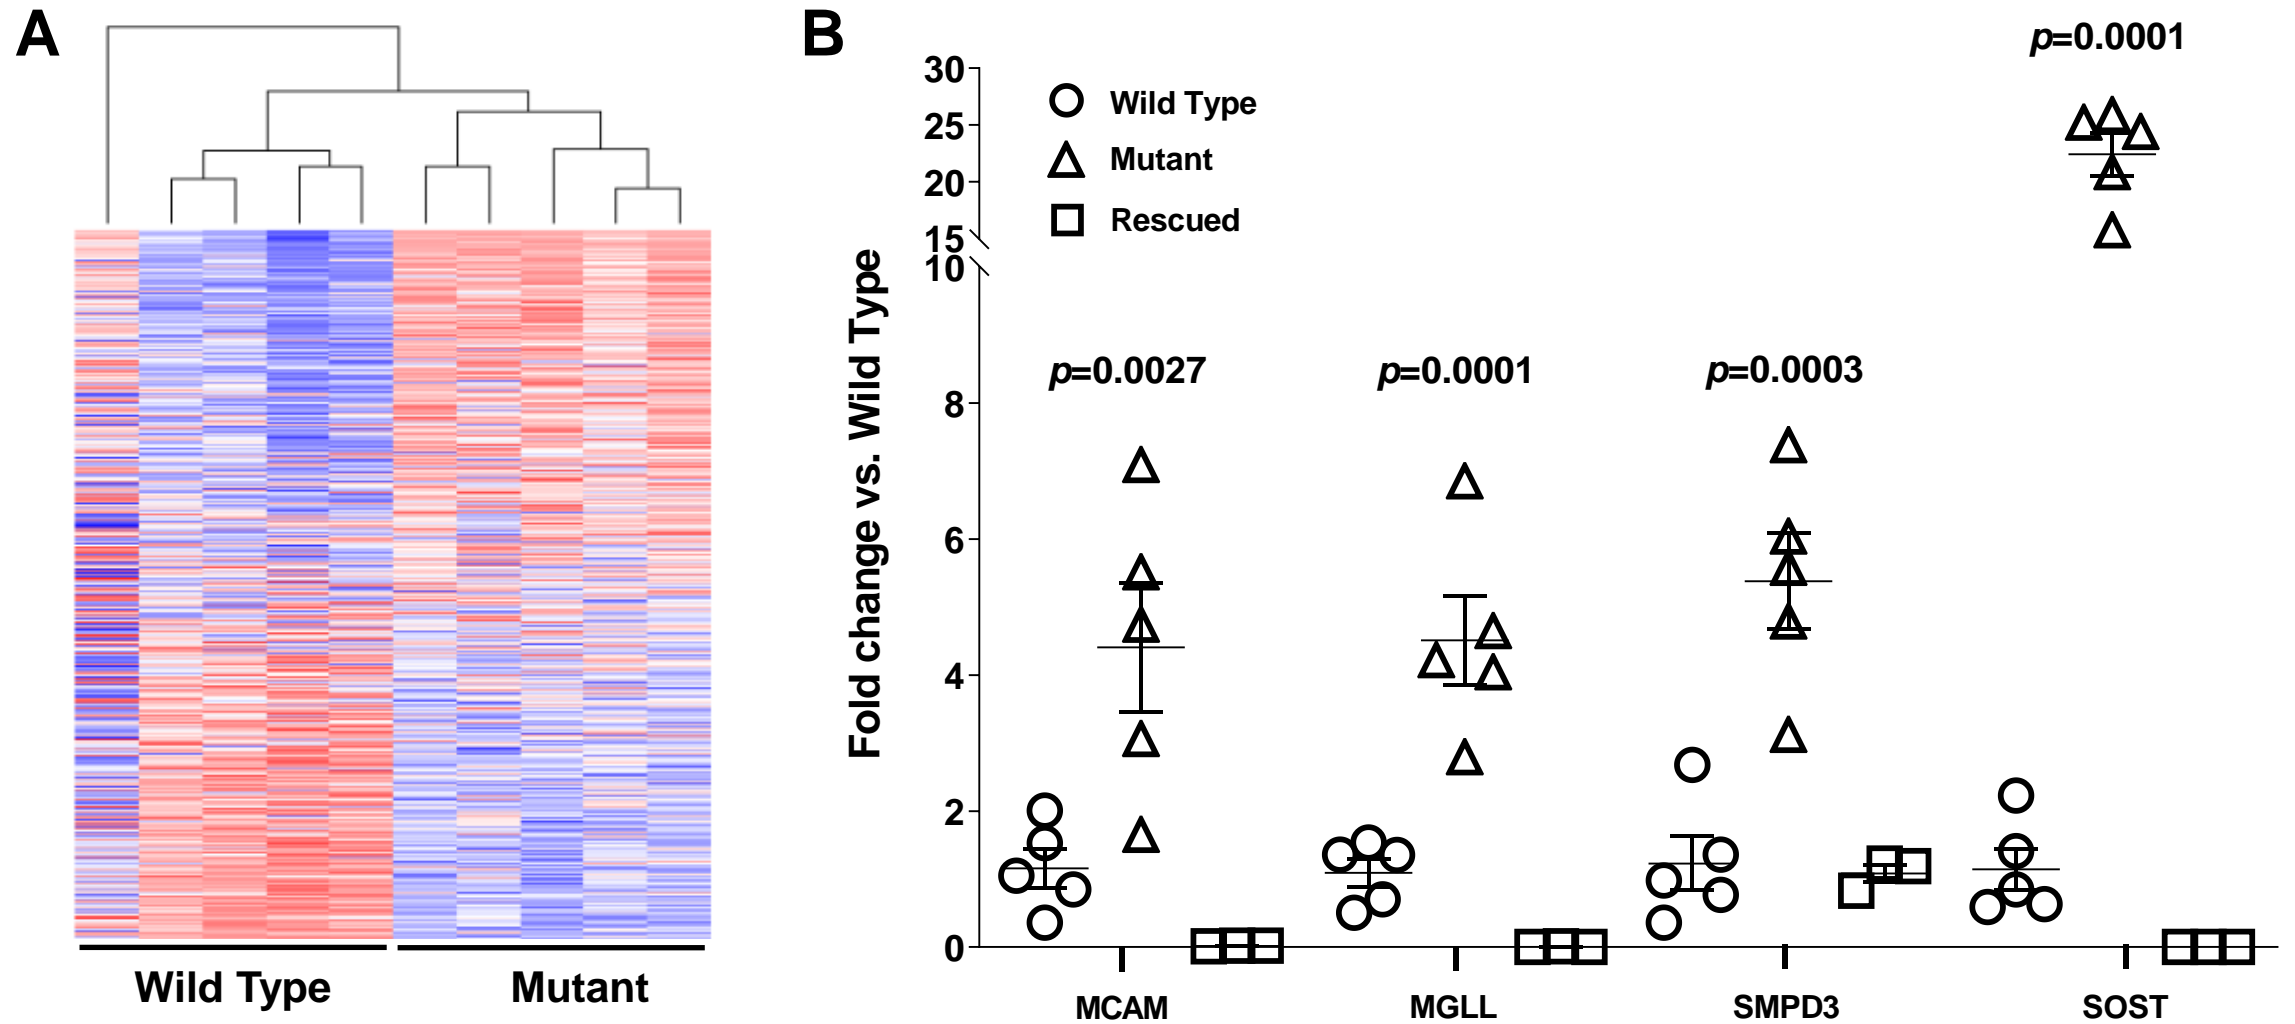

**Supplemental Figure 12. Loss of c-Kit activity in primary SMC upregulates genes associated with foam cell formation.** (A) Heatmap of 12,891 differentially expressed genes (FDR<0.05) in c-Kit deficient (mutant [Kit<sup>Mut</sup>], n=5) vs. wild type (n=5) primary SMC as detected by bulk RNA sequencing. Upregulated genes are in red while downregulated genes are in blue. (B) qRT-PCR of select differentially expressed genes associated with SMC migration and lipid metabolism in wild type, mutant (Kit<sup>Mut</sup>), and rescued Kit<sup>Mut</sup> cells after transduction with a c-Kit expressing lentivirus. c-Kit expression was normalized using GAPDH levels. Data are presented as mean fold change  $\pm$  S.E.M vs. wild type and compared using a one-way ANOVA followed by Tukey's multiple comparisons test.



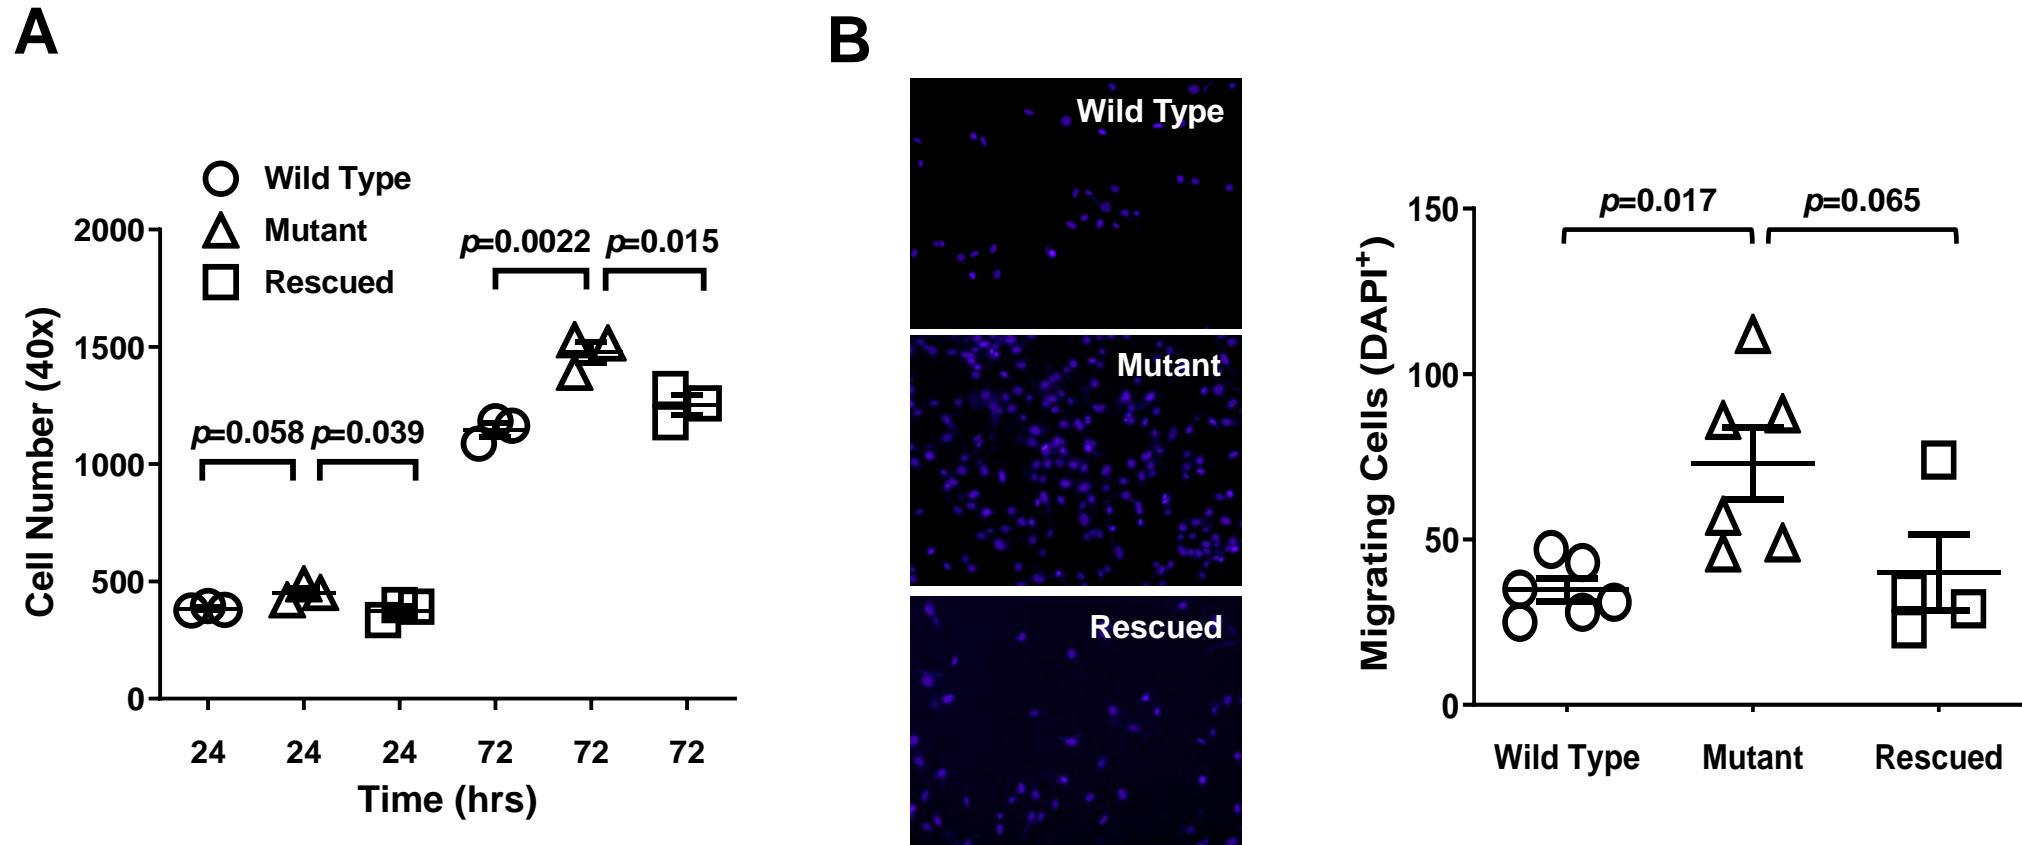

**Supplementary Figure 13. c-Kit deficiency increases proliferation and migration of primary SMC.** (A) Wild type and c-Kit deficient ( $Kit^{Mut}$ ) SMCs were seeded in 6-well plates. After synchronization with serum deprived medium overnight, cells were trypsinized and counted consecutively for 3 days. Results represent three independent experiments using primary cells from different wild type and  $Kit^{Mut}$  mice. (B) Representative images of Boyden chamber SMC migration of wild type, c-Kit mutant ( $Kit^{Mut}$ ) and rescued SMC after exposure to PDGFB stimulation, along with the quantification of number of migrating cells. Each point represents independent experiments. Data are presented as mean  $\pm$  S.E.M. Groups were compared using a one-way ANOVA followed by Tukey's multiple comparisons test.
